# Supplementary material for: Metabolomics of alcoholic liver disease: a clinical discovery study
Source: Royal Society of Chemistry journal article supplement (doi:10.1039/c5ra13417j), 2015-01-01
Supplement: c5ra13417j1.pdf [file c5ra13417j1.pdf]

**Supplementary Table 1.** Clinical characteristics of the subjects at baseline

| Samples                   | ALD          | Control     |
|---------------------------|--------------|-------------|
| Sample No.                | 206          | 101         |
| Age                       | 31±3         | 30±2        |
| Sex (F/M)                 | 198/318      | 46/55       |
| BMI(kg/m <sup>2</sup> )   | 26.11±2.54   | 23.24±2.19  |
| ALT (U/L)                 | 146.33±68.35 | 89.17±56.40 |
| AST (U/L)                 | 166.87±84.43 | 96.10±67.45 |
| Total bilirubin (mg/dL)   | 4.29±2.47    | 1.91±1.04   |
| Direct bilirubin(mg/dL)   | 2.81±1.67    | 1.34 ± 0.88 |
| Indirect bilirubin(mg/dL) | 1.92±0.46    | 0.89 ± 0.29 |
